# Supplementary figures and images for: Artificial intelligence identified peptides modulate inflammation in healthy adults
Source: Royal Society of Chemistry journal article supplement (doi:10.1039/c9fo01398a), 2019-01-01

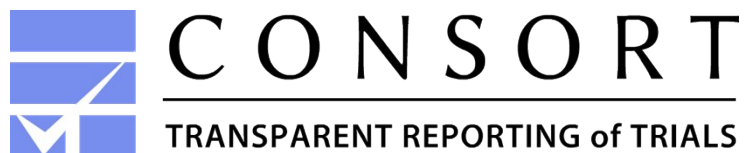

### CONSORT 2010 Flow Diagram

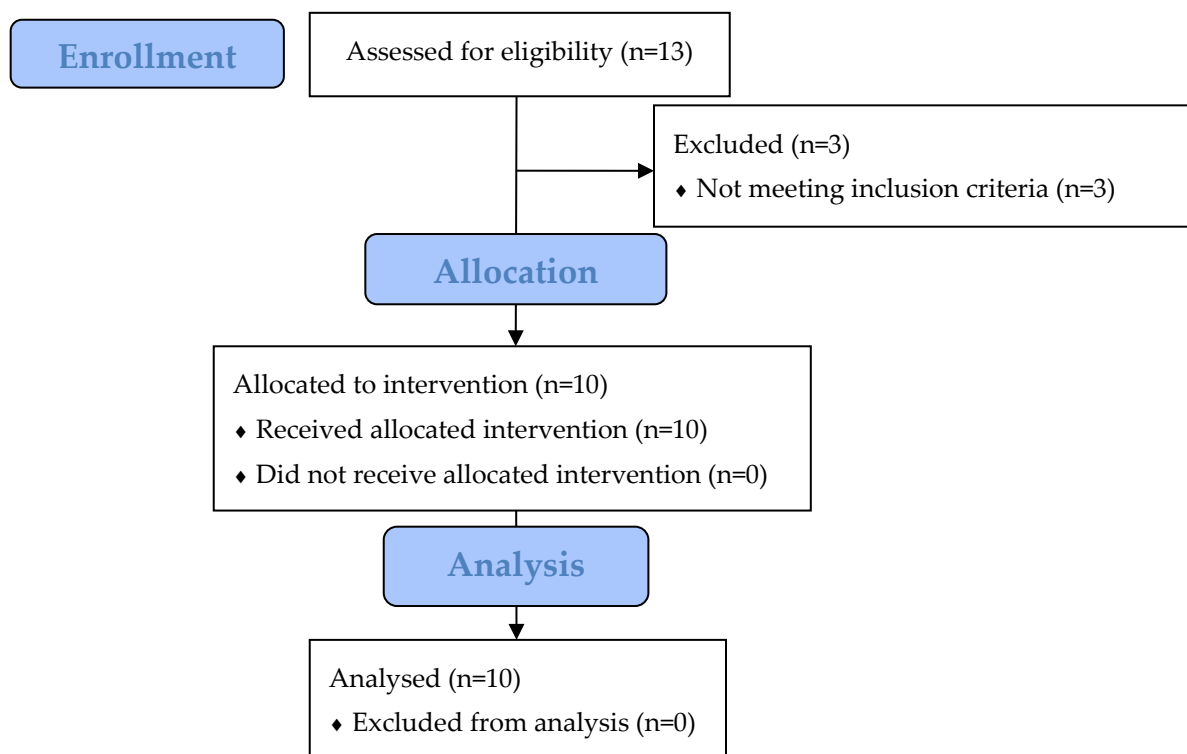

Supplement: c9fo01398a1.pdf [file c9fo01398a1.pdf]
